# Supplementary material for: Crosstalk between above- and belowground herbivores is mediated by minute metabolic responses of the host Arabidopsis thaliana
Source: PubMed Central journal article supplement — J Exp Bot. 2012 Oct 5;63(17):6199–210. doi: 10.1093/jxb/ers274 (PMC3481212; doi:10.1093/jxb/ers274), 2012-10-05
Supplement: supp_ers274_jexbot083766_file001.pdf [file supp_ers274_jexbot083766_file001.pdf]

**Metabolic plant responses to above- and belowground herbivory and plant-mediated crosstalk between herbivores on *Arabidopsis thaliana***

*Magdalene Kutyniok and Caroline Mueller*

**Table S1.** Mean relative abundances ( $\pm$  SD) of primary metabolites identified by GC-MS in *Arabidopsis thaliana* shoot tissue of control (C), aphid (A), nematode (N) and aphid+nematode treated plants (AN) 3 dpi. The substance identities were either verified by comparison with standards, with help of the online Golm database (GMD) using spectra and Kovats indices, or could not be verified. There were ten replicates per treatment; data are shown from one representative experiment out of two independent experiments. Metabolites that differed significantly between treatments are indicated in bold (Kruskal-Wallis,  $P < 0.05$ ). However, after Bonferroni correction, there were no significant differences between treatments ( $P > 0.05$ ).

| Substance            | Kovats index | Standard | GMD | Not identified | C                  | A                  | N                  | AN                 |
|----------------------|--------------|----------|-----|----------------|--------------------|--------------------|--------------------|--------------------|
| Pyruvic acid         | 1038         | X        | X   |                | 0.0047<br>(0.0009) | 0.0044<br>(0.0006) | 0.0051<br>(0.0012) | 0.0041<br>(0.0008) |
| Proline              | 1181         | X        | X   |                | 0.0068<br>(0.0066) | 0.0129<br>(0.0086) | 0.0367<br>(0.0360) | 0.0077<br>(0.0068) |
| Valine               | 1209         | X        | X   |                | 0.0030<br>(0.0016) | 0.0037<br>(0.0013) | 0.0035<br>(0.0013) | 0.0033<br>(0.0026) |
| Serine               | 1252/1353    | X        | X   |                | 0.177<br>(0.063)   | 0.181<br>(0.045)   | 0.184<br>(0.031)   | 0.201<br>(0.079)   |
| <b>Ethanolamine</b>  | 1260         |          | X   |                | 0.0088<br>(0.0014) | 0.0095<br>(0.0041) | 0.0111<br>(0.0025) | 0.0106<br>(0.0024) |
| Phosphoric acid      | 1263         |          | X   |                | 0.0167<br>(0.004)  | 0.015<br>(0.003)   | 0.013<br>(0.004)   | 0.015<br>(0.002)   |
| Glycerol             | 1266         | X        | X   |                | 1.365<br>(0.261)   | 1.532<br>(0.261)   | 1.485<br>(0.446)   | 1.473<br>(0.207)   |
| Threonine            | 1289/1378    | X        | X   |                | 0.065<br>(0.024)   | 0.072<br>(0.013)   | 0.069<br>(0.017)   | 0.072<br>(0.021)   |
| Glycine              | 1300         | X        | X   |                | 0.048<br>(0.021)   | 0.051<br>(0.015)   | 0.043<br>(0.014)   | 0.039<br>(0.010)   |
| Succinic acid        | 1310         | X        | X   |                | 0.046<br>(0.015)   | 0.037<br>(0.020)   | 0.040<br>(0.012)   | 0.041<br>(0.018)   |
| <b>Glyceric acid</b> | 1323         |          | X   |                | 0.021<br>(0.004)   | 0.017<br>(0.004)   | 0.019<br>(0.003)   | 0.016<br>(0.003)   |
| unknown              | 1327         |          |     | X              | 0.0067<br>(0.0027) | 0.0084<br>(0.0043) | 0.0159<br>(0.1900) | 0.0169<br>(0.0142) |
| Fumaric acid         | 1347         | X        | X   |                | 8.081<br>(5.538)   | 4.565<br>(4.261)   | 5.625<br>(3.338)   | 4.281<br>(3.472)   |

|                           |           |   |   |                    |                    |                    |                    |
|---------------------------|-----------|---|---|--------------------|--------------------|--------------------|--------------------|
| Threonic acid-1,4-lactone | 1370      |   | X | 0.0099<br>(0.0032) | 0.0077<br>(0.0013) | 0.0081<br>(0.0013) | 0.0085<br>(0.0029) |
| Aspartic acid             | 1421/1514 |   | X | 0.063<br>(0.015)   | 0.066<br>(0.018)   | 0.063<br>(0.017)   | 0.073<br>(0.021)   |
| Malic acid                | 1482      | X | X | 0.813<br>(0.180)   | 0.659<br>(0.175)   | 0.739<br>(0.187)   | 0.734<br>(0.404)   |
| Pyroglutamic acid         | 1522      |   | X | 0.145<br>(0.026)   | 0.175<br>(0.038)   | 0.168<br>(0.049)   | 0.177<br>(0.038)   |
| Butanoic acid, 4-amino-   | 1524      | X | X | 0.0070<br>(0.0041) | 0.0075<br>(0.0072) | 0.0083<br>(0.0045) | 0.0093<br>(0.0055) |
| Glutamic acid             | 1529/1614 | X | X | 0.060<br>(0.024)   | 0.060<br>(0.026)   | 0.059<br>(0.016)   | 0.064<br>(0.046)   |
| <b>unknown</b>            | 1551      |   | X | 0.084<br>(0.022)   | 0.044<br>(0.028)   | 0.057<br>(0.031)   | 0.074<br>(0.043)   |
| unknown                   | 1580      |   | X | 0.0082<br>(0.0033) | 0.0100<br>(0.0049) | 0.0106<br>(0.0039) | 0.0131<br>(0.0068) |
| unknown                   | 1594      |   | X | 0.0087<br>(0.0037) | 0.0092<br>(0.0067) | 0.0124<br>(0.0041) | 0.0149<br>(0.0073) |
| unknown                   | 1634      |   | X | 0.013<br>(0.003)   | 0.013<br>(0.005)   | 0.014<br>(0.002)   | 0.015<br>(0.003)   |
| Glycerol-3-phosphate      | 1752      | X | X | 0.0105<br>(0.0065) | 0.0067<br>(0.0043) | 0.0092<br>(0.0055) | 0.0084<br>(0.0082) |
| Shikimic acid             | 1801      | X | X | 0.0057<br>(0.0032) | 0.0066<br>(0.0025) | 0.0053<br>(0.0031) | 0.0047<br>(0.0033) |
| Citric acid               | 1809      | X | X | 0.257<br>(0.071)   | 0.263<br>(0.040)   | 0.241<br>(0.061)   | 0.264<br>(0.058)   |
| Dehydroascorbic acid      | 1840/1865 |   | X | 0.280<br>(0.070)   | 0.227<br>(0.120)   | 0.270<br>(0.039)   | 0.268<br>(0.100)   |
| Fructose                  | 1859/1868 | X | X | 1.682<br>(1.235)   | 0.895<br>(0.746)   | 1.058<br>(0.788)   | 1.025<br>(0.886)   |
| Galactose                 | 1877      | X | X | 0.0092<br>(0.0064) | 0.0057<br>(0.0035) | 0.0073<br>(0.0029) | 0.0062<br>(0.0041) |
| Glucose                   | 1884/1903 | X | X | 2.291<br>(2.020)   | 1.112<br>(1.013)   | 1.589<br>(0.864)   | 1.160<br>(0.842)   |
| unknown                   | 1896      |   | X | 0.066<br>(0.050)   | 0.035<br>(0.033)   | 0.047<br>(0.019)   | 0.042<br>(0.027)   |
| unknown                   | 1906      |   | X | 1.039<br>(0.953)   | 0.327<br>(0.322)   | 0.637<br>(0.333)   | 0.594<br>(0.488)   |
| unknown                   | 1925      |   | X | 0.0100<br>(0.0015) | 0.0114<br>(0.0035) | 0.0105<br>(0.0030) | 0.0123<br>(0.0033) |
| unknown                   | 1930      |   | X | 0.107<br>(0.014)   | 0.098<br>(0.025)   | 0.100<br>(0.023)   | 0.107<br>(0.015)   |

|                                |      |   |   |                    |                    |                    |                    |
|--------------------------------|------|---|---|--------------------|--------------------|--------------------|--------------------|
| unknown                        | 1939 |   | X | 0.240<br>(0.059)   | 0.188<br>(0.074)   | 0.194<br>(0.052)   | 0.203<br>(0.061)   |
| Gluconic acid                  | 1952 |   | X | 0.0058<br>(0.0005) | 0.0054<br>(0.0018) | 0.0053<br>(0.0014) | 0.0060<br>(0.0013) |
| Galatonic acid                 | 1982 |   | X | 0.026<br>(0.017)   | 0.018<br>(0.007)   | 0.021<br>(0.006)   | 0.021<br>(0.008)   |
| unknown                        | 2031 |   | X | 0.0096<br>(0.0026) | 0.0102<br>(0.0023) | 0.0102<br>(0.0019) | 0.0111<br>(0.0031) |
| unknown                        | 2068 |   | X | 0.025<br>(0.006)   | 0.022<br>(0.006)   | 0.021<br>(0.007)   | 0.024<br>(0.005)   |
| Inositol, myo-                 | 2079 | X | X | 2.314<br>(0.905)   | 1.670<br>(0.704)   | 1.909<br>(0.466)   | 1.745<br>(0.563)   |
| unknown                        | 2109 |   | X | 0.0066<br>(0.0031) | 0.0080<br>(0.0043) | 0.0064<br>(0.0031) | 0.0072<br>(0.0046) |
| Phytol                         | 2169 |   | X | 0.0133<br>(0.0044) | 0.0095<br>(0.0038) | 0.0111<br>(0.0029) | 0.0102<br>(0.0043) |
| unknown                        | 2175 |   | X | 0.013<br>(0.003)   | 0.015<br>(0.009)   | 0.013<br>(0.003)   | 0.012<br>(0.005)   |
| unknown                        | 2215 |   | X | 0.159<br>(0.031)   | 0.169<br>(0.023)   | 0.152<br>(0.020)   | 0.172<br>(0.027)   |
| Sucrose                        | 2615 | X |   | 3.939<br>(0.840)   | 3.614<br>(1.135)   | 3.513<br>(0.648)   | 3.783<br>(0.590)   |
| Trehalose, $\alpha$ - $\alpha$ | 2722 |   | X | 0.0084<br>(0.0024) | 0.0289<br>(0.0561) | 0.0080<br>(0.0022) | 0.0628<br>(0.1320) |
| unknown                        | 2953 |   | X | 0.070<br>(0.013)   | 0.071<br>(0.009)   | 0.067<br>(0.013)   | 0.071<br>(0.013)   |
| Galactinol                     | 2963 |   | X | 0.028<br>(0.016)   | 0.017<br>(0.013)   | 0.023<br>(0.011)   | 0.023<br>(0.017)   |
| unknown                        | 2984 |   | X | 0.078<br>(0.011)   | 0.078<br>(0.016)   | 0.084<br>(0.012)   | 0.093<br>(0.018)   |
| unknown                        | 2996 |   | X | 0.012<br>(0.003)   | 0.013<br>(0.002)   | 0.011<br>(0.003)   | 0.012<br>(0.003)   |
| unknown                        | 3026 |   | X | 0.366<br>(0.098)   | 0.392<br>(0.122)   | 0.385<br>(0.116)   | 0.396<br>(0.120)   |
| unknown                        | 3046 |   | X | 0.0062<br>(0.0021) | 0.0067<br>(0.0025) | 0.0069<br>(0.0012) | 0.0075<br>(0.0023) |
| unknown                        | 3103 |   | X | 0.0092<br>(0.0074) | 0.0083<br>(0.0071) | 0.0096<br>(0.0074) | 0.0083<br>(0.0082) |
| Raffinose                      | 3354 |   | X | 0.144<br>(0.080)   | 0.108<br>(0.083)   | 0.122<br>(0.051)   | 0.140<br>(0.083)   |

**Table S2.** Mean values ( $\pm$  SD) of shoot and root glucosinolate and glucosinolate group concentrations (in  $\mu\text{mol}$  per g fresh weight) in control (C), aphid (A), nematode (N) and aphid+nematode treated plants (AN) 3 dpi. There were ten replicates per treatment; data are shown from one representative experiment out of three independent experiments. Lower case letters indicate significant differences between treatments (glm).

| Tissue                 | Shoot                         |                               |                               |                               | Root                          |                               |                                |                               |
|------------------------|-------------------------------|-------------------------------|-------------------------------|-------------------------------|-------------------------------|-------------------------------|--------------------------------|-------------------------------|
|                        | C                             | A                             | N                             | AN                            | C                             | A                             | N                              | AN                            |
| Glucosinolate          |                               |                               |                               |                               |                               |                               |                                |                               |
| 3-Methylthiopropyl     | 0.0034<br>(0.0011)            | 0.0021<br>(0.0012)            | 0.0032<br>(0.0021)            | 0.0230<br>(0.0009)            |                               | n.d.                          |                                |                               |
| 4-Methylthiobutyl      | 0.900 <sub>a</sub><br>(0.127) | 0.669 <sub>b</sub><br>(0.178) | 0.792 <sub>a</sub><br>(0.234) | 0.721 <sub>b</sub><br>(0.178) | 0.028<br>(0.007)              | 0.019<br>(0.008)              | 0.024<br>(0.012)               | 0.025<br>(0.012)              |
| 5-Methylthiopentyl     | 0.024 <sub>a</sub><br>(0.005) | 0.019 <sub>b</sub><br>(0.004) | 0.022 <sub>a</sub><br>(0.006) | 0.020 <sub>b</sub><br>(0.005) | 0.010<br>(0.030)              | 0.009<br>(0.002)              | 0.008<br>(0.002)               | 0.009<br>(0.002)              |
| 6-Methylthiohexyl      | 0.0045<br>(0.0012)            | 0.0035<br>(0.0010)            | 0.0042<br>(0.0015)            | 0.0035<br>(0.0010)            |                               | n.d.                          |                                |                               |
| 7-Methylthioheptyl     | 0.0772<br>(0.022)             | 0.068<br>(0.022)              | 0.073<br>(0.020)              | 0.060<br>(0.014)              | 0.157<br>(0.068)              | 0.162<br>(0.039)              | 0.145<br>(0.065)               | 0.135<br>(0.039)              |
| 8-Methylthiooctyl      | 0.6607<br>(0.097)             | 0.587<br>(0.153)              | 0.637<br>(0.137)              | 0.571<br>(0.120)              | 2.208<br>(0.563)              | 2.245<br>(0.356)              | 2.017<br>(0.611)               | 2.153<br>(0.460)              |
| 3-Methylsulfinylpropyl | 0.135 <sub>a</sub><br>(0.053) | 0.085 <sub>b</sub><br>(0.025) | 0.111 <sub>b</sub><br>(0.044) | 0.099 <sub>b</sub><br>(0.029) | 0.021 <sub>a</sub><br>(0.007) | 0.013 <sub>b</sub><br>(0.006) | 0.019 <sub>ab</sub><br>(0.007) | 0.020 <sub>a</sub><br>(0.007) |
| 4-Methylsulfinylbutyl  | 1.389 <sub>a</sub><br>(0.492) | 0.907 <sub>b</sub><br>(0.286) | 1.143 <sub>a</sub><br>(0.502) | 1.026 <sub>b</sub><br>(0.315) | 0.227 <sub>a</sub><br>(0.085) | 0.134 <sub>b</sub><br>(0.067) | 0.204 <sub>a</sub><br>(0.088)  | 0.227 <sub>a</sub><br>(0.089) |
| 5-Methylsulfinylpentyl | 0.034 <sub>a</sub><br>(0.010) | 0.023 <sub>b</sub><br>(0.005) | 0.029 <sub>b</sub><br>(0.010) | 0.027 <sub>b</sub><br>(0.007) | 0.008 <sub>a</sub><br>(0.002) | 0.006 <sub>b</sub><br>(0.002) | 0.007 <sub>a</sub><br>(0.002)  | 0.008 <sub>a</sub><br>(0.02)  |

|                           |                                     |                                     |                                      |                                      |                                       |                                       |                                       |                                       |
|---------------------------|-------------------------------------|-------------------------------------|--------------------------------------|--------------------------------------|---------------------------------------|---------------------------------------|---------------------------------------|---------------------------------------|
| 6-Methylsulfinyloxy       | 0.005<br>6<br>(0.0023)              | 0.003<br>4<br>(0.0014)              | 0.004<br>7<br>(0.0023)               | 0.003<br>7<br>(0.0013)               | 0.000<br>95 <sup>a</sup><br>(0.00048) | 0.000<br>63 <sup>a</sup><br>(0.00022) | 0.000<br>69 <sup>b</sup><br>(0.00027) | 0.000<br>65 <sup>a</sup><br>(0.00030) |
| 7-Methylsulfinyloxy       | 0.053<br>(0.015)                    | 0.037<br>(0.013)                    | 0.046<br>(0.017)                     | 0.039<br>(0.010)                     | 0.014<br>(0.005)                      | 0.011<br>(0.003)                      | 0.012<br>(0.004)                      | 0.011<br>(0.004)                      |
| 8-Methylsulfinyloxy       | 1.377<br>(0.290)                    | 1.046<br>(0.325)                    | 1.232<br>(0.399)                     | 1.124<br>(0.257)                     | 0.280<br>(0.081)                      | 0.235<br>(0.059)                      | 0.233<br>(0.057)                      | 0.240<br>(0.064)                      |
| 3-Methylbutyl             | 0.002<br>3 <sup>a</sup><br>(0.0006) | 0.001<br>5 <sup>b</sup><br>(0.0004) | 0.002<br>0 <sup>ab</sup><br>(0.0009) | 0.001<br>8 <sup>ab</sup><br>(0.0005) |                                       |                                       | n.d.                                  |                                       |
| 4-Methylpentyl            | 0.008<br>0 <sup>a</sup><br>(0.0020) | 0.005<br>4 <sup>b</sup><br>(0.0014) | 0.006<br>9 <sup>ab</sup><br>(0.0029) | 0.006<br>3 <sup>ab</sup><br>(0.0018) | 0.000<br>55<br>(0.00022)              | 0.000<br>39<br>(0.00020)              | 0.000<br>48<br>(0.00019)              | 0.000<br>54<br>(0.00019)              |
| 2-Phenethyl               | 0.018<br>a<br>(0.005)               | 0.013 <sup>b</sup><br>(0.003)       | 0.016 <sup>a</sup><br>b<br>(0.005)   | 0.015 <sup>a</sup><br>b<br>(0.004)   | 0.000<br>9<br>(0.0004)                | 0.000<br>64<br>(0.0004)               | 0.000<br>8<br>(0.0003)                | 0.001<br>(0.0004)                     |
| Indol-3-ylmethyl          | 0.612<br>(0.205)                    | 0.506<br>(0.173)                    | 0.562<br>(0.161)                     | 0.548<br>(0.160)                     | 0.272<br>(0.032)                      | 0.273<br>(0.064)                      | 0.248<br>(0.071)                      | 0.273<br>(0.072)                      |
| 1-Methoxyindol-3-ylmethyl | 0.069<br>(0.017)                    | 0.072<br>(0.040)                    | 0.099<br>(0.061)                     | 0.084<br>(0.037)                     | 1.589<br>(0.215)                      | 1.341<br>(0.339)                      | 1.576<br>(0.380)                      | 1.639<br>(0.266)                      |
| 4-Methoxyindol-3-ylmethyl | 0.404<br>(0.132)                    | 0.350<br>(0.082)                    | 0.354<br>(0.102)                     | 0.330<br>(0.082)                     | 0.341<br>(0.082)                      | 0.340<br>(0.049)                      | 0.302<br>(0.086)                      | 0.326<br>(0.054)                      |
| 4-Hydroxyindol-3-ylmethyl | 0.014<br>(0.005)                    | 0.012<br>(0.003)                    | 0.012<br>(0.004)                     | 0.012<br>(0.004)                     | 0.156<br>(0.037)                      | 0.154<br>(0.036)                      | 0.146<br>(0.056)                      | 0.146<br>(0.028)                      |
| Total aliphatic           | 4.674<br>a<br>(0.902)               | 3.457 <sup>b</sup><br>(0.844)       | 4.106 <sup>a</sup><br>b<br>(1.232)   | 3.703 <sup>b</sup><br>(0.855)        | 2.956<br>(0.615)                      | 2.835<br>(0.477)                      | 2.672<br>(0.679)                      | 2.830<br>(0.536)                      |
| Total indole              | 1.099<br>(0.303)                    | 0.940<br>(0.252)                    | 1.028<br>(0.258)                     | 0.973<br>(0.241)                     | 2.359<br>(0.333)                      | 2.115<br>(0.408)                      | 2.272<br>(0.557)                      | 2.384<br>(0.364)                      |
| Total                     | 5.790<br>(1.166)                    | 4.409<br>(1.044)                    | 5.150<br>(1.484)                     | 4.691<br>(1.079)                     | 5.316<br>(0.928)                      | 4.951<br>(0.871)                      | 4.945<br>(1.208)                      | 5.215<br>(0.871)                      |

n.d. not detected
